# Supplementary material for: Real-time Bidirectional Feedback and Multimodal Teaching Boost Clinical Skills in Compressed Infectious Disease Clerkships
Source: Research Square preprint supplement (doi:10.21203/rs.3.rs-6669437/v1), 2025-08-21
Supplement: Supplementary file 1 [file fdd0c38ef28c2451ea748edf.docx]

Supplementary Table 1. PBL Scenarios for Infectious Disease Clerkship.

| No. | PBL Topics |
| --- | --- |
| 1 | A 58-year-old female presents with sudden-onset fever and coma |
| 2 | Two neighboring patients of CRAB-positive case develop fever and cough |
| 3 | HIV-positive patient experiences sudden headache and neck stiffness |
| 4 | elderly farmer in a rural area develops fever, rash, and hemoptysis after fieldwork |
| 5 | 3 post-hepatobiliary surgery patients develop wound exudate culture-positive for VRE. |
| 6 | Asymptomatic HCV RNA-positive patient exhibits F4 fibrosis on FibroScan |
| 7 | 20-year-old female presents with yellowing of skin/sclera, joint swelling |
| 8 | A traveler develops fever and "currant jelly stool" |
| 9 | A male patient presents with sudden-onset fever, shock, lower back pain, and oliguria |
| 10 | A rural child complains of abdominal pain and bloody stools |

Supplementary Table 2. CBL cases for Infectious Disease Clerkship.

| No. | CBL Cases |
| --- | --- |
| 1 | A 32-year-old male with persistent fever for 3 weeks accompanied by weight loss; routine laboratory tests show no abnormalities |
| 2 | An ICU patient with sepsis caused by carbapenem-resistant Klebsiella pneumoniae (CRKP) infection |
| 3 | An HIV-positive patient with a CD4+ T-cell count <50/μL, presenting with progressive dyspnea |
| 4 | An individual returning from Africa with high fever, headache, and malarial ring forms observed on blood smear |
| 5 | Three cases of postoperative incision infections in a surgical ward, all caused by methicillin-resistant *Staphylococcus aureus* (MRSA) |
| 6 | A hepatitis B surface antigen (HBsAg)-positive patient with normal liver function tests but liver elastography indicating cirrhosis. |
| 7 | A cluster of pneumonia cases in a region with an unknown pathogen |
| 8 | A diabetic patient with a 2-month history of cough; sputum acid-fast staining is negative, but T-SPOT.TB (interferon-gamma release assay) is positive |
| 9 | A leukemia patient with febrile neutropenia following chemotherapy, presenting with high fever, chills, and hypotension |
| 10 | A 9-year-old girl presenting with jaundice and splenomegaly; abdominal ultrasound suggests cirrhosis, while all viral hepatitis serological markers are negative |

Supplementary Table 3. Comparison of Baseline Characteristics Between Two Student Groups.

|  | RTBFS  N=237 | Traditional  N=237 | *P* value |
| --- | --- | --- | --- |
| Age(y) a | 21.94±0.49 | 21.89±0.57 | 0.491c |
| Gender (%) b |  |  | 0.353 d |
| male | 140(59.07) | 132(55.70) |  |
| female | 97(40.93) | 105(44.30) |  |

Abbreviations: RTBFS: Real-Time Bidirectional Feedback System. a Age is expressed as the mean ± standard deviation. b Genderis presented as number of subjects, with percentage of total students in parentheses. c Students’ age between RTBFS groups and Traditional group were compared using a Mann-Whitney U test. d The Wilcoxon rank-sum test was used to compare gender in two groups.
